## RESEARCH ARTICLE

## Flexibility in thermoregulatory physiology of two dunnarts, *Sminthopsis macroura* and *Sminthopsis ooldea* (Marsupialia; Dasyuridae)

Sean Tomlinson<sup>1,\*</sup>, Philip C. Withers<sup>1</sup> and Shane K. Maloney<sup>2</sup>

<sup>1</sup>School of Animal Biology, Faculty of Natural and Agricultural Sciences and <sup>2</sup>School of Anatomy, Physiology and Human Biology, Faculty of Life and Physical Sciences, The University of Western Australia, Crawley 6009 WA, Australia

\*Author for correspondence (sean.tomlinson@bgpa.wa.gov.au)

## SUMMARY

Stripe-faced dunnarts (*Sminthopsis macroura*) and Ooldea dunnarts (*S. ooldea*) were acclimated for 2 weeks to ambient temperature ( $T_a$ ) regimes of 12–22°C, 18–28°C and 25–35°C, and then measured for standard, basal (BMR) and maximum (MMR) metabolic rate using flow-through respirometry. *Sminthopsis macroura* maintained a stable body temperature under all experimental  $T_a$  and acclimation regimes. Although its BMR was not statistically different between the three acclimation regimes, the lower end of the thermoneutral zone (TNZ) shifted from 30°C under the 18–28°C and 12–22°C acclimation regimes to 35°C under the 25–35°C acclimation regime. MMR increased significantly at the cooler acclimation regimes. EWL increased at  $T_a=35^\circ\text{C}$ , compared with lower  $T_a$ , in all acclimation regimes, but an increase in evaporative water loss (EWL) at  $T_a=10^\circ\text{C}$  observed in cool acclimations did not occur at the 25–35°C regime. In contrast, *S. ooldea* had variable body temperature between experimental  $T_a$  in all acclimation regimes, but no acclimational shift in TNZ, which was between 30 and 35°C. Neither BMR nor MMR was affected by exposure to the three acclimation regimes. EWL did not change across  $T_a$  or with acclimation regime. *Sminthopsis macroura* was flexible in many aspects of its thermoregulation (involving energy and water balance) in response to thermal acclimation, presumably allowing it to balance its energy and water requirements over a broad range of climatic conditions. *Sminthopsis ooldea* seems to have an inflexible energetic and water balance in response to thermal acclimation, but has low nominal expenditure of either resource on thermoregulation because it thermoregulates less precisely than *S. macroura*. It seems that *S. ooldea* is adapted to a more narrow, stable climate.

Key words: thermoregulation, metabolic rate, evaporative water loss, physiological flexibility, acclimation, *Sminthopsis macroura*, *Sminthopsis ooldea*.

Received 8 September 2011; Accepted 14 March 2012

## INTRODUCTION

Phenotypic plasticity [or flexibility *sensu* Piersma and Drent (Piersma and Drent, 2003)] occurs when organisms respond to environmental variability on an ecological scale (Nespolo et al., 2001), whereby aspects of physiology, for example, are altered in a way that optimises the phenotype for certain environmental conditions (Lewontin, 1969; Feder, 1987). For example, birds and mammals enhance heat or cold resistance seasonally (acclimatisation) or in response to short-term, experimental thermal challenges (acclimation) (Nespolo et al., 2001; Soobramoney et al., 2003). Dawson (Dawson, 2003) suggested that higher ambient temperatures (either in the laboratory or as a result of seasonal warming) can lead to downregulation of metabolic capacity in birds, including changes in thermogenic capacity measured as basal metabolic rate (BMR) or maximum metabolic rate (MMR) (Bozinovic et al., 1990; Nespolo et al., 2001). Nespolo et al. (Nespolo et al., 2001) suggested, however, that MMR provides the most accurate assessment of acclimation and thermoregulatory flexibility because it incorporates BMR together with shivering and non-shivering thermogenesis, all of which can be enhanced in response to continued exposure to low temperatures. As such, MMR provides an omnibus measure of thermoregulatory response capacity.

Although it has been shown for several species that metabolic rate is flexible in response to environmental changes, less is known about the flexibility of evaporative water loss (EWL). Although

evaporative heat loss (EHL) is a major thermoregulatory effector during high temperature exposure (Angilletta et al., 2010), elevated EHL at low temperature exposures, resulting from poor recuperative heat and water exchange in the respiratory tract, can be a significant contributor to thermal balance when ventilation increases to satisfy increased oxygen demand. Therefore, thermal acclimation may not only influence metabolic rate but also impact the water budget. Recent studies have shown a flexibility of EWL in birds (Williams and Tieleman, 2000) and large mammals (Ostrowski et al., 2006). This has implications for the water budget [e.g. relative water economy (RWE), the amount of water lost relative to levels of metabolic water production, as discussed by Cooper and others (Cooper and Withers, 2008; Cooper and Withers, 2009; Cooper et al., 2009; Withers and Cooper, 2009)], especially in species adapted to arid habitats with variable and unpredictable conditions (Lee and Schmidt-Nielsen, 1971; Menon et al., 1989; Williams and Tieleman, 2000). The current paucity of data on the interaction between water loss and energetics makes prediction of the effects of thermal acclimation upon these aspects of physiology difficult, but the importance of these data to the basic physiology suggests that they should be incorporated into acclimational studies.

Enhancement or contraction of metabolism can impart acclimatory responses in homeothermic mammals, but heterothermic mammals are intrinsically more flexible in their metabolic responses to acute changes in their environment (Geiser and Turbill, 2009).

Although there has been interest in the acclimation of heterotherms to chronic changes in temperature, these have most often focused upon biochemical aspects of thermogenesis (Klingenspor et al., 2000; Nespolo et al., 2002) and the increased energy efficiency of re-warming after torpor (Opazo et al., 1999). At a coarser scale, however, energetic plasticity may include changes in the propensity towards torpor, the length and depth of bouts, or the intensity of torpor use in response to environmental conditions, optimising torpor use as an evasive strategy at low ambient temperature ( $T_a$ ) (Geiser, 1994; Geiser et al., 2003). Although some species enter torpor only under thermal challenges of low temperature, food restriction or both (Hudson, 1978; Wang, 1989; Withers et al., 1990; Malan, 1996), the propensity of a species to enter torpor following acclimation to different environmental conditions has been investigated only recently when Munn et al. (Munn et al., 2010) showed that bouts of torpor occurred more often when food was available stochastically than when the same amount of food was available consistently. Given that torpor is viewed as an adaptation that reduces energy expenditure that is normally associated with thermoregulation (Nicol and Anderson, 1996; Grigg and Beard, 2000), a heterotherm acclimated to low temperatures might not utilise torpor as much if it has acclimatory compensation mechanisms to low temperature, other than torpor, that result in lower overall energy use (i.e. torpor use may be reduced as a response to cold in cold-acclimated heterotherms).

*Sminthopsis macroura* (Gould 1845) and *S. ooldea* Troughton 1965 represent two distinct clades of dunnart, the *S. macroura* and *S. psammophila* species groups, respectively (Archer, 1981; Blacket et al., 1999). *Sminthopsis macroura* has an extensive geographical distribution across Australia (McKenzie et al., 2006), whereas *S. ooldea* is limited to the central Australian arid environments of Western Australia, South Australia and the Northern Territory (Aslin, 1983). The considerable environmental variation across the geographic distribution of *S. macroura* would suggest that this species is highly adaptable, whereas *S. ooldea* may be more specifically adapted to, and therefore limited to, the 'hyper-arid' environments of the Australian centre (*sensu* Archer, 1981; Withers and Cooper, 2009). The two species are similar in ecology, habit and even size and mass range (Ewer, 1968; Aslin, 1983; Morton, 1983a; Morton, 1983b), but have substantially different basic energetic patterns. *Sminthopsis macroura* appears to be a strong thermoregulator and a classical heterotherm (i.e. spontaneous, regulated daily torpor), but *S. ooldea* is more thermolabile while also using torpor (Tomlinson, 2012). Where two closely related species diverge in their distributions, especially where many aspects of their biology are very similar, differences in their thermogenic plasticity may be an important driver of this divergence.

The focus of the present study was to determine the capacity of *S. macroura* and *S. ooldea* to acclimate to changes in ambient temperatures (i.e. to respond over a period of weeks rather than tolerate over a period of hours in a respirometry trial), and establish whether any differences were related to their differing distributions and thermal physiology. 'Phenotypic plasticity' is taken to be variability in BMR, metabolic heat production (MHP), MMR and propensity for torpor, as well as evaporative water loss (EWL), EHL and RWE following acclimation to different ambient temperature regimes. We predict that both aspects of metabolism (BMR and MMR) of the two dunnarts studied here will show plasticity resulting from acclimation, but we expect this plasticity to differ between the species. As a contributor to thermoregulation, EWL (through EHL) should be reduced at low  $T_a$  following chronic cold acclimation, reducing respiratory heat and energy loss and thus

increasing RWE. *Sminthopsis macroura*, having a broad distribution covering a range of climatic conditions, and being a strong thermoregulator (Tomlinson, 2012), is expected to show phenotypic flexibility, essentially tailoring the thermoregulatory energy budget to chronic  $T_a$  regimes. *Sminthopsis ooldea* is expected to be less variable in response to acclimation to a range of chronic  $T_a$  regimes because of the lower climatic variation within its geographic distribution.

## MATERIALS AND METHODS

### Animal housing and acclimation regimes

Stripe-faced dunnarts (*S. macroura*) were captured from various locations within the natural distribution of the species in Western Australia, and Ooldea dunnarts (*S. ooldea*) were captured at Lorna Glen Station (26.227°S, 121.5597°E). The dunnarts were transferred to the University of Western Australia (Crawley campus) within 1 week of capture. The dunnarts were maintained on a *per diem* diet of approximately 1 g of minced red meat (generally kangaroo), a similar portion of canned cat food and three mealworms (*Tenebrio molitor* larvae). For the duration of acclimation, the dunnarts were maintained in a social arena in which they could socialise freely, but during the period of respirometry experiments the individuals were housed separately (in containers approximately 40×50×30 cm length×width×depth) so that they could be food deprived for ≥12 h prior to measurement. The dunnarts were acclimated to several  $T_a$  regimes for 2 weeks each prior to experimental measurements of their metabolic rates under these different regimes. Temperature regimes consisted of 12 h low nocturnal  $T_a$ , followed by 10°C elevation to a higher diurnal  $T_a$ . These acclimation regimes were 12–22°C, 18–28°C and 25–35°C. The 18–28°C regime was selected because it overlaps the maintenance conditions described by other studies with which these data can be compared (Geiser and Baudinette, 1985; Song et al., 1995; Song and Geiser, 1997; Song et al., 1998; Cooper et al., 2005; Withers and Cooper, 2009), whereas the higher and lower regimes encompass almost the full breadth of average temperatures experienced within the geographical distributions of the species (Australian Bureau of Meteorology, unpublished data).

All animal procedures conformed to guidelines of the National Health and Medical Research Council and were approved by the Animal Ethics Committee of The University of Western Australia under permits RA/3/100/654, RA/3/100/704 and RA/3/100/868.

### Respirometry

Two flow-through respirometry systems (see Withers, 2001) consisted of airflow through a cylindrical PVC metabolic chamber (270×250 mm) that was regulated at approximately 437 ml min<sup>-1</sup> (standard temperature and pressure) by an Aalborg GFC-17 (Aalborg, New York, NY, USA) or a Brooks 5871-A (Brooks Instrument, Hatfield, PA, USA) mass flow controller. Relative humidity of the excurrent air stream was measured by Vaisala HMP 35B and HMI 33 probes (Vaisala Oyj, Helsinki, Finland), which also measured  $T_a$  within the temperature-controlled cabinet. Excurrent air was then dried by a Drierite column (anhydrous calcium sulfate; W. A. Hammond Drierite, Xenia, OH, USA), and passed through a David Bishop 280 Combo gas analyser (David Bishop Instruments, Warwickshire, UK) which measured both [O<sub>2</sub>] and [CO<sub>2</sub>]. The analysers were interfaced to a PC using a PICO ADC-11 A/D converter (Pico Technology, St Neots, Cambridgeshire, UK) and recorded using custom-written Visual Basic v6.0 software (Microsoft, Redmond, WA, USA). Ambient temperatures for the acute 8-h measurement trials were 10, 25, 30

and 35°C (in random order), with one trial being conducted per day. Individual dunnarts were only tested once in any three consecutive days.

Baseline readings of background O<sub>2</sub> and CO<sub>2</sub> were established for 60 min before and after metabolic trials. Metabolic rate was measured for at least 8 h until a 20 min steady recording was obtained. Body temperature ( $T_b$ ) was measured to  $\pm 0.1^\circ\text{C}$  at the end of the trials using a pre-calibrated Radiospares 611-234 thermocouple reader (Wetherill Park, NSW, Australia) by inserting a thermocouple 1.5 cm into the rectum within 1 min of removing the dunnart from the chamber. These methods precluded the measurement of  $T_b$  during normothermia or torpor prior to the end of the experiment. Estimation of basic physiological parameters was made using custom-written Visual Basic v6.0 software that calculated  $\dot{V}_{\text{O}_2}$ ,  $\dot{V}_{\text{CO}_2}$  and EWL according to Withers (Withers, 2001), by averaging the lowest and most stable 20 min period. The point where these rates were minimal for euthermic dunnarts was considered to be BMR, and was otherwise referred to as standard metabolic rate (SMR). Wet thermal conductance ( $C_{\text{wet}}$ ) was calculated as  $C_{\text{wet}} = \dot{V}_{\text{O}_2} / (T_b - T_a)$ , measured in  $\text{ml O}_2 \text{ g}^{-1} \text{ h}^{-1} \text{ }^\circ\text{C}^{-1}$ , and converted to  $\text{J g}^{-1} \text{ h}^{-1} \text{ }^\circ\text{C}^{-1}$  by multiplying  $\dot{V}_{\text{O}_2}$  by  $20.1 \text{ J ml}^{-1} \text{ O}_2$ . Dry thermal conductance ( $C_{\text{dry}}$ ) was subsequently calculated as  $C_{\text{dry}} = \{(\dot{V}_{\text{O}_2} \times 20.1) - [(\text{EWL} \times 10^{-3}) \times \text{latent heat of evaporation}]\} / (T_b - T_a)$ . Metabolic water production (MWP;  $\text{mg H}_2\text{O ml}^{-1} \text{ O}_2$ ), calculated using the measured RER by the equation  $\text{MWP} = (0.326 \times \text{RER}) + 0.337$  after Withers (Withers, 1992) and Cooper and Withers (Cooper and Withers, 2009), was used to estimate the relative water economy (RWE;  $\text{MWP}/\text{EWL}$ ) and the point of relative water economy (PRWE), which is the  $T_a$  where  $\text{RWE} = 1$ . All allometric corrections for the effects of body mass ( $M$ ) are made using scaling exponents reported by Withers et al. (Withers et al., 2006) of  $M^{0.75}$  for metabolic rate,  $M^{0.68}$  for EWL and  $M^{0.57}$  for thermal conductance.

Maximum metabolism was measured by flow-through respirometry in a helox atmosphere (19.1% O<sub>2</sub> in He; BOC, Perth, WA, Australia) at  $T_a = 10^\circ\text{C}$  (Rosenmann and Morrison, 1974; Smith and Dawson, 1985; Geiser et al., 1996; Thomas et al., 1998; Holloway and Geiser, 2001; Geiser et al., 2003). Baseline readings of air and helox were taken for 20 min before and after the trial. The dunnarts were exposed to helox for 20 min, or until their metabolism declined from a peak, reflecting incipient hypothermia, at which time they were removed and  $T_b$  was measured. MMR was estimated using custom-written Visual Basic v6.0 software by measuring the peak  $\dot{V}_{\text{O}_2}$  and  $\dot{V}_{\text{CO}_2}$  following the introduction of a dunnart to the system, and also by averaging the metabolic rate over the first two and five minutes of the trial.

### Statistical analysis

The effect of  $T_a$  on physiological variables was examined by linear regression and ANOVA, with Student–Newman–Keuls (SNK) *post hoc* tests. Initially a repeated-measures design was intended; however, natural attrition of individuals during the study period precluded this. Given that a repeated-measures design accounts for individual variation and so has a lower error term, the use of full-factorial ANOVA is generally more conservative than repeated-measures ANOVA (see Cohen, 2008). The maintenance of normothermic  $T_b$  was tested by linear regression against  $T_a$ , and was additionally analysed by testing the equality of variance of the  $T_b$  residuals between the  $T_a$  treatments using a Bartlett's test. Torpor data were compared with normothermia data using ANOVA. The occurrence of torpor appeared to be random amongst individuals, as not all individuals had the same responses at all experimental  $T_a$

values. Comparisons of normothermic metabolism between acclimation regimes were made within species by comparing the slope and intercept of the regressions of metabolic rate ( $\dot{V}_{\text{O}_2}$  and  $\dot{V}_{\text{CO}_2}$ ) below the thermoneutral zone (TNZ). Normothermic responses of each species were examined by comparing regressions below the TNZ. Comparisons of maximum metabolism, propensity towards torpor, and torpid metabolism between acclimation regimes were made by ANOVA. All statistical analyses with the exception of Bartlett's test of variance were conducted using statistiXL v.1.7 (statistiXL, www.statistixl.com). Bartlett's test of variance was conducted by hand, following Zar (Zar, 1999). Following discussion by Felsenstein (Felsenstein, 1985) and Garland and Adolph (Garland and Adolph, 1994) suggesting that two-species comparisons are less informative than phylogenetically informed analyses, these data would benefit from phylogenetic correction. Such strategies were, however, precluded by the paucity of data on metabolic physiology and acclimation responses in the Sminthopsini. Values are presented as means  $\pm$  s.e.m.; sample sizes are given as  $n$ =the number of individuals and  $N$ =total sample size (i.e. the total number of measurements).

## RESULTS

### Body mass and acclimation

Body mass across all respirometry trials and all acclimation regimes was  $17.1 \pm 0.29 \text{ g}$  for *S. macroura* ( $n=6$ ,  $N=24$ ) and  $11.1 \pm 0.13 \text{ g}$  for *S. ooldea* ( $n=8$ ,  $N=32$ ). There was no significant change in body mass of *S. macroura* at the different acute  $T_a$  treatments within the 12–22°C regime ( $F_{4,25}=0.190$ ,  $P=0.942$ ), the 18–28°C regime ( $F_{4,24}=0.500$ ,  $P=0.735$ ) or the 25–35°C regime ( $F_{4,24}=1.16$ ,  $P=0.355$ ). However, body mass was significantly higher during the 25–35°C regime than during the other two acclimation regimes ( $F_{2,87}=17.8$ ,  $P=3.36 \times 10^{-7}$ ; Table 1). There were no significant changes in the body mass of *S. ooldea* within the 18–28°C regime ( $F_{3,28}=0.390$ ,  $P=0.761$ ), the 12–22°C regime ( $F_{3,28}=2.04$ ,  $P=0.131$ ) or the 25–35°C regime ( $F_{3,28}=0.480$ ,  $P=0.698$ ), but they were heavier for the 12–22°C regime than the other two regimes ( $F_{2,93}=4.87$ ,  $P=0.00980$ ; Table 1).

### Body temperature and basal metabolic rate

The  $T_b$  of *S. macroura* was consistent between acclimation regimes ( $33.8 \pm 0.2^\circ\text{C}$ ; two-way ANOVA,  $T_a$ ,  $F_{2,55}=0.593$ ,  $P=0.556$ ; Table 2), and under all acute ambient temperature exposures between acclimation regimes (acclimation,  $F_{6,55}=1.07$ ,  $P=0.391$ ). There was no difference in the variance of the  $T_b$  residuals at different  $T_a$  treatments between acclimation regimes ( $B_{C,11}=19.5$ ,  $P=0.053$ ). In contrast, *S. ooldea* was thermolabile across acclimation regimes, where average  $T_b$  for *S. ooldea* showed significant variation with  $T_a$  (two-way ANOVA,  $T_a$ ,  $F_{3,72}=8.16$ ,  $P=9.77 \times 10^{-5}$ ) and acclimation regime (two-way ANOVA, acclimation,  $F_{2,79}=3.44$ ,  $P=0.0377$ ). The variance of  $T_b$  residuals differed significantly between acute  $T_a$  treatments and the acclimation regimes ( $B_{C,11}=64.9$ ,  $P=1.12 \times 10^{-9}$ ).

At all acclimation regimes, *S. macroura* showed decreasing SMR from  $T_a = 10^\circ\text{C}$  to BMR. Under the 12–22°C and 18–28°C acclimation regimes, BMR occurred at  $T_a = 30^\circ\text{C}$ , which is presumed to be within the TNZ because metabolism was higher at  $T_a = 35^\circ\text{C}$  (Table 2). Under the 25–35°C acclimation regime, however, SMR was lowest (i.e. BMR) at  $T_a = 35^\circ\text{C}$ . The mass-corrected ( $M^{0.75}$ ) BMR was not statistically different between the three acclimation regimes in respect to  $\dot{V}_{\text{O}_2}$  ( $F_{2,15}=2.14$ ,  $P=0.153$ ) or  $\dot{V}_{\text{CO}_2}$  ( $F_{2,15}=1.57$ ,  $P=0.240$ ). Despite the shift in TNZ under the warmest acclimation regime, the metabolic profile below the TNZ was not statistically

Table 1. Summary of metabolic physiology of *S. macroura* and *S. ooldea* at the three different acclimation regimes tested

| Physiological variable                                    | Acclimation regime  |                     |                      |
|-----------------------------------------------------------|---------------------|---------------------|----------------------|
|                                                           | 12–22°C             | 18–28°C             | 25–35°C              |
| <i>S. macroura</i>                                        |                     |                     |                      |
| Body mass (g)                                             | 16.1±0.4 (6, 24)    | 16.0±0.5 (6, 24)    | 19.1±0.3 (6, 24)*    |
| $T_b$ (°C)                                                | 33.7±0.4 (6, 21)    | 33.8±0.4 (6, 23)    | 34.1±0.4 (6, 23)     |
| BMR (ml O <sub>2</sub> g <sup>-1</sup> h <sup>-1</sup> )  | 1.43±0.29 (6)       | 1.57±0.34 (6)       | 0.80±0.14 (6)        |
| BMR (ml CO <sub>2</sub> g <sup>-1</sup> h <sup>-1</sup> ) | 1.25±0.34 (6)       | 0.88±0.18 (6)       | 0.58±0.14 (6)        |
| MR regression slope                                       | -0.28±0.04 (6, 18)  | -0.27±0.03 (8, 18)  | -0.16±0.04 (6, 18)   |
| MR regression intercept                                   | 9.35±1.11 (6, 18)   | 8.61±0.83 (8, 18)   | 6.45±1.02 (6, 18)    |
| PRWE (°C)                                                 | -9.0 (6, 22)        | -8.7 (6, 23)        | -4.8 (6, 24)         |
| RWE regression slope                                      | -0.02±0.003 (6, 22) | -0.02±0.003 (6, 23) | -0.02±0.002 (6, 24)  |
| <i>S. ooldea</i>                                          |                     |                     |                      |
| Body mass (g)                                             | 11.6±0.1 (8, 32)    | 10.6±0.3 (8, 32)    | 11.0±0.2 (8, 32)*    |
| $T_b$ (°C)                                                | 33.9±0.3 (8, 30)    | 34.6±0.4 (8, 21)    | 33.9±0.4 (8, 25)     |
| BMR (ml O <sub>2</sub> g <sup>-1</sup> h <sup>-1</sup> )  | 1.39±0.29 (8)       | 1.72±0.22 (8)       | 1.67±0.23 (8)        |
| BMR (ml CO <sub>2</sub> g <sup>-1</sup> h <sup>-1</sup> ) | 0.77±0.11 (8)       | 1.14±0.10 (8)       | 1.24±0.13 (8)        |
| MR regression slope                                       | -0.28±0.08 (8, 22)  | -0.17±0.05 (8, 18)  | -0.25±0.03 (8, 22)   |
| MR regression intercept                                   | 9.47±0.72 (8, 22)   | 6.91±1.17 (8, 18)   | 9.08±0.72 (8, 22)    |
| PRWE (°C)                                                 | 9.0 (8, 31)         | -15.0 (8, 28)       | 1.7 (8, 30)*         |
| RWE regression slope                                      | -0.03±0.004 (8, 31) | -0.02±0.003 (8, 28) | -0.03±0.003 (8, 30)* |

Data are presented as means ± s.e.m.; sample sizes are presented in parentheses ( $n$ ,  $N$ ), where  $n$  is the number of individuals and  $N$  is the total sample size.

Asterisks denote significant differences between acclimation regimes. See the List of symbols and abbreviations for definitions of variables and abbreviations.

different between the three acclimation regimes (slope,  $F_{2,46}=2.54$ ,  $P=0.0890$ ; intercept,  $F_{2,48}=0.691$ ,  $P=0.506$ ), with a common regression of  $\dot{V}_{O_2}=8.089-0.207T_a$ .

*Sminthopsis ooldea* maintained a pattern of decreasing SMR from  $T_a=10$  to 30°C between all acclimation regimes. For the 12–22°C acclimation regime, metabolic rate increased between  $T_a=30$  and 35°C (TNZ beginning between  $T_a=25$  and 30°C and ending between  $T_a=30$  and 35°C) and 35°C ( $\dot{V}_{O_2}$ ,  $t_{6,64}=2.38$ ,  $P=0.049$ ;  $\dot{V}_{CO_2}$ ,  $t_{11,0}=2.57$ ,  $P=0.026$ ; Table 2). For the 18–28°C acclimation regime there was no difference in metabolic rate between  $T_a=30$  and 35°C ( $\dot{V}_{O_2}$ ,  $t_{10}=0.831$ ,  $P=0.425$ ;  $\dot{V}_{CO_2}$ ,  $t_{5,04}=0.811$ ,  $P=0.454$ ; Table 2), which is assumed to represent BMR in the TNZ (beginning between  $T_a=25$  and 30°C and ending above  $T_a=35$ °C). For the 25–35°C acclimation regime, BMR at  $T_a=30$ °C was not different from that at  $T_a=35$ °C ( $\dot{V}_{O_2}$ ,  $t_{11}=0.327$ ,  $P=0.750$ ;  $\dot{V}_{CO_2}$ ,  $t_{11}=0.181$ ,  $P=0.860$ ; Table 2), again implying that the TNZ began between  $T_a=25$  and 30°C and ended above  $T_a=35$ °C. The mass-corrected BMR ( $T_a=30$ °C) was not statistically different between the three acclimation regimes in respect to  $\dot{V}_{O_2}$  ( $F_{2,21}=0.253$ ,  $P=0.779$ ) or  $\dot{V}_{CO_2}$  ( $F_{2,21}=0.947$ ,  $P=0.404$ ). The metabolic response to  $T_a$  was not statistically different between the three acclimation regimes (slope,  $F_{2,55}=2.252$ ,  $P=0.115$ ; intercept,  $F_{2,57}=0.286$ ,  $P=0.752$ ), with a common regression of  $\dot{V}_{O_2}=10.602-0.288T_a$ .

The normothermic respiratory exchange ratio (RER) of *S. macroura* did not change significantly between ambient temperatures within the 12–22°C ( $F_{3,18}=0.26$ ,  $P=0.850$ ), 18–28°C ( $F_{3,20}=1.07$ ,  $P=0.385$ ) or 25–35°C regimes ( $F_{3,20}=0.46$ ,  $P=0.708$ ; see Tables 1, 2 for values). The RER, pooled by acclimation regime, was not significantly different between acclimation regimes (two-way ANOVA, acclimation,  $F_{2,67}=0.25$ ,  $P=0.780$ ) and there was no interaction with  $T_a$  (acclimation  $\times$   $T_a$ ,  $F_{6,63}=0.64$ ,  $P=0.697$ ), averaging  $0.79\pm 0.04$  ( $N=12$ ). *Sminthopsis ooldea* also showed no significant difference in normothermic RER between ambient temperatures within the 12–22°C ( $F_{3,25}=0.865$ ,  $P=0.472$ ), 18–28°C ( $F_{3,22}=0.441$ ,  $P=0.726$ ) or 25–35°C regimes ( $F_{3,24}=0.277$ ,  $P=0.841$ ; see Tables 1, 2). RER pooled by acclimation regime showed no significant difference between acclimations (two-way ANOVA,

acclimation,  $F_{2,80}=2.61$ ,  $P=0.081$ ), and no significant interaction with  $T_a$  (acclimation  $\times$   $T_a$ ,  $F_{6,76}=0.440$ ,  $P=0.850$ ), averaging  $0.77\pm 0.02$  ( $N=12$ ).

#### Evaporative water loss, thermal conductance and water economy

There were significant differences in EWL of *S. macroura* across the experimental  $T_a$  range for the 12–22°C acclimation regime ( $F_{3,18}=3.76$ ,  $P=0.029$ ; Table 1) and the 18–28°C regime ( $F_{3,20}=4.69$ ,  $P=0.0120$ ), but not the 25–35°C regime ( $F_{3,20}=0.263$ ,  $P=0.851$ ). EWL increased at both  $T_a=10$  and 35°C compared with the TNZ in the cool acclimation regimes, but not under the 25–35°C regime (Table 1). A pattern of stable  $C_{wet}$  and  $C_{dry}$  between  $T_a=10$  and 30°C, with an increase at  $T_a=35$ °C, was consistent between the acclimation regimes. There was no significant effect of acclimation regime on  $C_{wet}$  (two-way ANOVA, acclimation,  $F_{2,58}=1.21$ ,  $P=0.308$ ;  $T_a$ ,  $F_{3,57}=20.2$ ,  $P=1.31\times 10^{-8}$ ; acclimation  $\times$   $T_a$ ,  $F_{6,54}=1.59$ ,  $P=0.169$ ) or  $C_{dry}$  (two-way ANOVA; acclimation,  $F_{2,58}=1.31$ ,  $P=0.278$ ;  $T_a$ ,  $F_{3,57}=6.89$ ,  $P=0.001$ ; acclimation  $\times$   $T_a$ ,  $F_{6,54}=1.37$ ,  $P=0.244$ ), but there were significant increases in both at  $T_a=35$ °C during all acclimation regimes. RWE increased with decreasing  $T_a$  under all three acclimation regimes (Tables 1, 2). The RWE profile was not statistically different for the three acclimation regimes (slope  $F_{2,64}=0.542$ ,  $P=0.584$ ; intercept  $F_{2,66}=0.375$ ,  $P=0.688$ ), with a common regression of  $RWE=0.85-0.02T_a$ . The extrapolated PRWE was similar between all three acclimation regimes and averaged  $-6.8\pm 1.2$ °C (Table 1).

A constant EWL between  $T_a=10$  and 35°C was evident for *S. ooldea* across all three acclimation regimes (12–22°C,  $F_{3,26}=1.759$ ,  $P=0.180$ ; 18–28°C,  $F_{3,24}=0.548$ ,  $P=0.654$ ; 25–35°C,  $F_{3,25}=1.296$ ,  $P=0.298$ ; Table 1). The pattern of stable  $C_{wet}$  and  $C_{dry}$  between  $T_a=10$  and 30°C, with an increase at  $T_a=35$ °C, was also consistent between the acclimation regimes. There was no significant effect of acclimation regime on  $C_{wet}$  (two-way ANOVA, acclimation,  $F_{2,71}=0.342$ ,  $P=0.711$ ;  $T_a$ ,  $F_{3,70}=12.9$ ,  $P=1.13\times 10^{-6}$ ; acclimation  $\times$   $T_a$ ,  $F_{6,67}=0.277$ ,  $P=0.946$ ) or  $C_{dry}$  (two-way ANOVA; acclimation,  $F_{2,71}=0.368$ ,  $P=0.694$ ;  $T_a$ ,  $F_{3,70}=4.443$ ,  $P=0.007$ ; acclimation  $\times$   $T_a$ ,

Table 2. Thermoregulatory variables for *Sminthopsis macroura* and *S. ooldea* at the three different acclimation regimes tested

| Thermoregulatory variable                                       | Acclimation regime | 10°C       | 25°C       | 30°C       | 35°C        | P                      |
|-----------------------------------------------------------------|--------------------|------------|------------|------------|-------------|------------------------|
| <i>S. macroura</i>                                              |                    |            |            |            |             |                        |
| $T_b$ (°C)                                                      | 12–22°C            | 32.67±1.20 | 31.50±0.43 | 34.33±0.49 | 35.67±0.21  | 0.00006                |
|                                                                 | 18–28°C            | 31.87±2.62 | 32.92±0.58 | 33.38±0.55 | 35.05±0.87  | 0.181                  |
|                                                                 | 25–35°C            | 33.40±1.36 | 32.33±0.21 | 35.00±0.63 | 35.50±0.34  | 0.016                  |
| $\dot{V}_{O_2}$ (ml g <sup>-1</sup> h <sup>-1</sup> )           | 12–22°C            | 7.07±1.01  | 2.41±0.51  | 1.43±0.29  | 2.06±0.32   | 7.81×10 <sup>-6</sup>  |
|                                                                 | 18–28°C            | 6.24±0.53  | 2.35±0.27  | 1.45±0.26  | 1.47±0.27   | 6.96×10 <sup>-7</sup>  |
|                                                                 | 25–35°C            | 5.75±0.85  | 2.98±0.60  | 1.60±0.26  | 0.80±0.14   | 0.0003                 |
| $\dot{V}_{CO_2}$ (ml g <sup>-1</sup> h <sup>-1</sup> )          | 12–22°C            | 6.49±0.88  | 2.12±0.62  | 1.25±0.34  | 1.48±0.35   | 2.58×10 <sup>-5</sup>  |
|                                                                 | 18–28°C            | 5.58±0.55  | 1.88±0.51  | 1.05±0.28  | 0.95±0.17   | 1.01×10 <sup>-6</sup>  |
|                                                                 | 25–35°C            | 4.63±0.70  | 2.35±0.64  | 1.43±0.40  | 0.58±0.14   | 0.002                  |
| RER                                                             | 12–22°C            | 0.92±0.01  | 0.83±0.13  | 0.84±0.13  | 0.75±0.15   | 0.85                   |
|                                                                 | 18–28°C            | 0.89±0.04  | 0.75±0.10  | 0.71±0.08  | 0.65±0.05   | 0.385                  |
|                                                                 | 25–35°C            | 0.81±0.05  | 0.74±0.07  | 0.83±0.14  | 0.70±0.07   | 0.708                  |
| EWL (mg g <sup>-1</sup> h <sup>-1</sup> )                       | 12–22°C            | 8.30±1.71  | 3.72±0.89  | 5.68±1.52  | 8.70±0.82   | 0.029                  |
|                                                                 | 18–28°C            | 6.47±0.75  | 3.59±1.08  | 3.58±0.46  | 6.35±0.71   | 0.018                  |
|                                                                 | 25–35°C            | 5.68±0.77  | 5.37±1.46  | 6.02±1.63  | 6.89±1.07   | 0.851                  |
| $C_{wet}$ (J g <sup>-1</sup> h <sup>-1</sup> °C <sup>-1</sup> ) | 12–22°C            | 7.20±1.24  | 7.61±1.70  | 6.76±1.43  | 35.14±7.18  | 0.000152               |
|                                                                 | 18–28°C            | 5.69±0.47  | 6.31±1.09  | 11.76±4.37 | 20.39±4.92  | 0.032                  |
|                                                                 | 25–35°C            | 1.42±3.35  | 8.24±1.60  | 6.62±1.39  | 18.86±3.83  | 1.92×10 <sup>-5</sup>  |
| $C_{dry}$ (J g <sup>-1</sup> h <sup>-1</sup> °C <sup>-1</sup> ) | 12–22°C            | 6.15±0.98  | 5.83±1.43  | 3.86±1.23  | 16.87±4.48  | 0.011                  |
|                                                                 | 18–28°C            | 5.04±0.44  | 5.09±0.72  | 8.23±3.11  | 12.92±5.31  | 0.089                  |
|                                                                 | 25–35°C            | 4.12±0.62  | 6.45±1.20  | 3.61±0.56  | 6.26±3.28   | 0.049                  |
| RWE                                                             | 12–22°C            | 0.57±0.06  | 0.34±0.06  | 0.17±0.02  | 0.13×0.01   | 2.31×10 <sup>-6</sup>  |
|                                                                 | 18–28°C            | 0.58±0.07  | 0.44±0.06  | 0.20±0.02  | 0.13±0.02   | 1.21×10 <sup>-5</sup>  |
|                                                                 | 25–35°C            | 0.61±0.03  | 0.37±0.04  | 0.18±0.01  | 0.08±0.02   | 8.72×10 <sup>-12</sup> |
| N                                                               | 12–22°C            | 4          | 6          | 6          | 6           |                        |
|                                                                 | 18–28°C            | 5          | 6          | 6          | 6           |                        |
|                                                                 | 25–35°C            | 6          | 6          | 6          | 6           |                        |
| <i>S. ooldea</i>                                                |                    |            |            |            |             |                        |
| $T_b$ (°C)                                                      | 12–22°C            | 33.32±0.70 | 33.60±0.53 | 32.68±0.60 | 35.93±0.31  | 0.001                  |
|                                                                 | 18–28°C            | 33.93±0.99 | 31.70±1.30 | 33.83±0.48 | 36.49±0.30  | 0.0003                 |
|                                                                 | 25–35°C            | 32.13±0.92 | 35.00±0.48 | 32.61±0.44 | 35.54±0.45  | 0.0002                 |
| $\dot{V}_{O_2}$ (ml g <sup>-1</sup> h <sup>-1</sup> )           | 12–22°C            | 6.96±0.91  | 3.55±0.43  | 1.63±0.23  | 1.91±0.10   | 2.48×10 <sup>-7</sup>  |
|                                                                 | 18–28°C            | 5.12±1.39  | 3.36±0.67  | 1.78±0.33  | 1.75±0.19   | 0.011                  |
|                                                                 | 25–35°C            | 7.64±0.59  | 4.01±0.48  | 1.99±0.51  | 1.78±0.23   | 1.00×10 <sup>-7</sup>  |
| $\dot{V}_{CO_2}$ (ml g <sup>-1</sup> h <sup>-1</sup> )          | 12–22°C            | 5.62±0.66  | 2.57±0.39  | 0.81±0.07  | 1.20±0.15   | 1.23×10 <sup>-8</sup>  |
|                                                                 | 18–28°C            | 4.02±1.02  | 2.69±0.58  | 1.20±0.19  | 1.05±0.12   | 0.003                  |
|                                                                 | 25–35°C            | 6.28±0.53  | 3.32±0.40  | 1.08±0.26  | 1.18±0.13   | 1.80×10 <sup>-7</sup>  |
| RER                                                             | 12–22°C            | 0.82±0.02  | 0.72±0.07  | 0.58±0.10  | 0.66±0.09   | 0.472                  |
|                                                                 | 18–28°C            | 0.81±0.06  | 0.78±0.10  | 0.69±0.06  | 0.66±0.11   | 0.726                  |
|                                                                 | 25–35°C            | 0.82±0.04  | 0.84±0.05  | 0.69±0.13  | 0.73±0.09   | 0.841                  |
| EWL (mg g <sup>-1</sup> h <sup>-1</sup> )                       | 12–22°C            | 5.55±1.38  | 6.19±1.65  | 4.22±0.33  | 7.77±0.50   | 0.180                  |
|                                                                 | 18–28°C            | 5.87±1.75  | 5.89±1.84  | 4.80±1.52  | 7.46±1.30   | 0.298                  |
|                                                                 | 25–35°C            | 6.05±0.77  | 6.23±0.73  | 4.96±0.93  | 7.24±0.87   | 0.660                  |
| $C_{wet}$ (J g <sup>-1</sup> h <sup>-1</sup> °C <sup>-1</sup> ) | 12–22°C            | 5.98±0.86  | 8.98±1.45  | 16.85±4.12 | 39.34±7.67  | 0.0001                 |
|                                                                 | 18–28°C            | 3.86±0.74  | 5.58±0.27  | 10.85±1.16 | 35.22±10.15 | 0.036                  |
|                                                                 | 25–35°C            | 6.83±0.46  | 7.94±1.36  | 18.00±7.79 | 29.49±5.95  | 0.092                  |
| $C_{dry}$ (J g <sup>-1</sup> h <sup>-1</sup> °C <sup>-1</sup> ) | 12–22°C            | 5.41±0.79  | 7.14±1.23  | 11.97±3.31 | 21.09±4.97  | 0.010                  |
|                                                                 | 18–28°C            | 3.27±0.60  | 4.88±0.26  | 7.13±0.77  | 17.73±7.08  | 0.262                  |
|                                                                 | 25–35°C            | 6.16±0.34  | 6.57±1.36  | 12.67±6.42 | 15.44±5.69  | 0.602                  |
| RWE                                                             | 12–22°C            | 0.94±0.14  | 0.45±0.08  | 0.20±0.02  | 0.13±0.01   | 6.46×10 <sup>-9</sup>  |
|                                                                 | 18–28°C            | 0.54±0.07  | 0.41±0.06  | 0.28±0.05  | 0.14±0.02   | 3.93×10 <sup>-6</sup>  |
|                                                                 | 25–35°C            | 0.76±0.07  | 0.44±0.07  | 0.23±0.04  | 0.14±0.02   | 2.84×10 <sup>-9</sup>  |
| N                                                               | 12–22°C            | 7          | 8          | 7          | 7           |                        |
|                                                                 | 18–28°C            | 6          | 7          | 6          | 7           |                        |
|                                                                 | 25–35°C            | 7          | 8          | 8          | 8           |                        |

Data are means ± s.e.m. Reduced  $N$ -values at low  $T_a$  are the result of individuals entering torpor early in a trial and not arousing for the 8 h duration.  $P$  is the probability of significant differences occurring between acute  $T_a$  treatments within each acclimation regime (significant differences occurred where  $P < 0.05$ ). See the List of symbols and abbreviations for definitions of variables and abbreviations.

$F_{6,67}=0.180$ ,  $P=0.981$ ). RWE of *S. ooldea* showed the same pattern of increasing economy with decreasing  $T_a$  for all three acclimation regimes. The RWE profile was statistically different between the three acclimation regimes (slope  $F_{2,83}=7.221$ ,  $P=0.001$ ; Tables 1, 2), and each acclimation regime had a statistically significant RWE profile: 12–22°C ( $F_{1,29}=65.4$ ,  $P=6.46 \times 10^{-9}$ ),

RWE=1.32±0.12–0.03±0.004 $T_a$ ; 18–28°C ( $F_{1,26}=33.9$ ,  $P=3.93 \times 10^{-6}$ ), RWE=0.75±0.08–0.02±0.003 $T_a$ ; and 25–35°C ( $F_{1,28}=72.8$ ,  $P=2.84 \times 10^{-9}$ ), RWE=1.04±0.08–0.03±0.003 $T_a$ .

The extrapolated PRWE was different between all three acclimation regimes, ranging from –15.0°C under the 18–28°C regime to 9.0°C under the 12–22°C regime (Table 1).

## Maximum metabolic rate

There was a general decrease in MMR of *S. macroura* with an increase in the acclimation temperature, from  $17.01 \pm 3.90 \text{ ml O}_2 \text{ g}^{-1} \text{ h}^{-1}$  and  $9.50 \pm 1.85 \text{ ml CO}_2 \text{ g}^{-1} \text{ h}^{-1}$  at the 12–22°C acclimation regime to  $9.53 \pm 1.21 \text{ ml O}_2 \text{ g}^{-1} \text{ h}^{-1}$  and  $8.07 \pm 0.36 \text{ ml CO}_2 \text{ g}^{-1} \text{ h}^{-1}$  at the 25–35°C acclimation regime. After MMR was log-transformed to normalise unequal variances, maximum  $\dot{V}_{\text{O}_2}$  ( $\dot{V}_{\text{O}_2, \text{max}}$ ) showed a significant decrease from the coolest acclimation regime to the warmest ( $F_{1,16}=4.77$ ,  $P=0.044$ ; Table 3). There was no difference in the maximum  $\dot{V}_{\text{CO}_2}$  ( $\dot{V}_{\text{CO}_2, \text{max}}$ ) of *S. macroura* across the acclimation regimes ( $F_{1,16}=0.240$ ,  $P=0.631$ ). There was no change in MMR ( $\dot{V}_{\text{O}_2}$  or  $\dot{V}_{\text{CO}_2}$ ) across the acclimation regimes for *S. ooldea* ( $\text{O}_2$ ,  $F_{2,18}=0.796$ ,  $P=0.466$ ;  $\text{CO}_2$ ,  $F_{2,18}=0.905$ ,  $P=0.422$ ; Table 3). The RER for *S. macroura* was  $0.78 \pm 0.07$ , with no effect of acclimation regime ( $F_{2,15}=0.557$ ,  $P=0.584$ ), but RER was  $0.69 \pm 0.07$  for *S. ooldea*, with a significant increase in the 25–35°C acclimation regime ( $F_{2,18}=4.21$ ,  $P=0.032$ ).

Body temperature of *S. macroura* in helox at  $T_a=10^\circ\text{C}$  decreased slightly below normothermic  $T_b$  in air at  $T_a=10^\circ\text{C}$  for all of the acclimation regimes (12–22°C,  $T_b=27.5 \pm 1.15^\circ\text{C}$ ,  $\Delta T_b=4.7 \pm 1.45^\circ\text{C}$ ,  $t_7=2.78$ ,  $P=0.027$ ; 18–28°C,  $T_b=27.5 \pm 1.02^\circ\text{C}$ ,  $\Delta T_b=6.8 \pm 0.86^\circ\text{C}$ ,  $t_9=4.80$ ,  $P=0.001$ ; 25–35°C,  $T_b=26.8 \pm 0.75^\circ\text{C}$ ,  $\Delta T_b=6.4 \pm 1.50^\circ\text{C}$ ,  $t_9=4.43$ ,  $P=0.002$ ). In contrast, the  $T_b$  of *S. ooldea* in helox at  $T_a=10^\circ\text{C}$  was similar to normothermic  $T_b$  values in air at  $T_a=10^\circ\text{C}$  for all of the acclimation regimes (12–22°C,  $T_b=30.6 \pm 2.08^\circ\text{C}$ ,  $\Delta T_b=0.1 \pm 1.28^\circ\text{C}$ ,  $t_{8,51}=1.22$ ,  $P=0.252$ ; 18–28°C,  $T_b=30.3 \pm 1.26^\circ\text{C}$ ,  $\Delta T_b=2.2 \pm 1.09^\circ\text{C}$ ,  $t_7=1.86$ ,  $P=0.105$ ; 25–35°C,  $T_b=28.7 \pm 2.67^\circ\text{C}$ ,  $\Delta T_b=3.0 \pm 1.51^\circ\text{C}$ ,  $t_{8,51}=2.24$ ,  $P=0.052$ ).

Factorial thermogenic scope (i.e. MMR divided by BMR) of *S. macroura* (Table 3) did not differ between acclimation regimes ( $\text{O}_2$ ,  $F_{2,15}=0.631$ ,  $P=0.546$ ;  $\text{CO}_2$ ,  $F_{2,15}=0.314$ ,  $P=0.735$ ), averaging 12.7 (range 10.2–14.3) for  $\dot{V}_{\text{O}_2}$  and 15.2 (range 13.4–18.2) for  $\dot{V}_{\text{CO}_2}$ . The thermogenic scope of *S. ooldea* was variable (Table 3), but was not significantly different between acclimation regimes ( $\text{O}_2$ ,  $F_{2,14}=0.240$ ,  $P=0.789$ ;  $\text{CO}_2$ ,  $F_{2,16}=0.381$ ,  $P=0.690$ ), averaging 7.23 (range 6.36–7.31) for  $\dot{V}_{\text{O}_2}$  and 10.08 (range 8.58–10.12) for  $\dot{V}_{\text{CO}_2}$ . The thermogenic scope of *S. macroura* (15.21; range 13.41–18.16) in helox at  $T_a=10^\circ\text{C}$  was 50% higher than that of *S. ooldea* (10.08; range 8.58–10.12), perhaps reflecting a difference in their propensities to thermoregulate in the face of thermal challenge.

## Torpor

Torpor (with endogenous arousal) was observed for *S. macroura* only at  $T_a=10^\circ\text{C}$ , in two trials (33%) in the 12–22°C acclimation regime and in three trials (50%) in the 18–28°C acclimation regime. In the 25–35°C acclimation regime, however, no torpor was recorded but there was one instance of hypothermia (a slow decline of metabolism compared with the rapid entry into torpor). *Sminthopsis ooldea* had a much greater propensity for torpor at both  $T_a=10$  and  $25^\circ\text{C}$ . The proportion of *S. ooldea* entering torpor remained fairly constant for all acclimation regimes with four individuals entering torpor (50% of trials) at both  $T_a=10$  and  $25^\circ\text{C}$  for the 12–22°C acclimation regime, and with five individuals entering torpor (62.5% of trials) at both  $T_a=10$  and  $25^\circ\text{C}$  for the 18–28°C and 25–35°C acclimation regimes. The pattern of torpor for these dunnarts was to enter torpor and arouse again before the completion of a metabolic trial; as such, sample sizes for *S. macroura* are low and thus not amenable to statistical analysis of the effects of acclimation upon torpor. Significant differences in torpid metabolic rate (TMR) were found for *S. ooldea*, where there was no effect of  $T_a$  ( $F_{1,25}=0.093$ ,  $P=0.763$ ), but warm acclimation significantly reduced TMR (averaged between the two acute  $T_a$  treatments) from  $1.78 \pm 0.27 \text{ ml O}_2 \text{ g}^{-1} \text{ h}^{-1}$  at the 12–22°C acclimation regime to  $0.77 \pm 0.20 \text{ ml O}_2 \text{ g}^{-1} \text{ h}^{-1}$  at the 25–35°C acclimation regime (acclimation,  $F_{2,24}=6.64$ ,  $P=0.006$ ).

## DISCUSSION

The broad context of this study was to examine whether *S. macroura*, a strongly thermoregulating dunnart with a broad geographic distribution, had a more flexible physiological response to chronic  $T_a$  acclimation regimes than a congeneric species, *S. ooldea*, a more thermolabile species with a narrow geographic distribution. The rationale was that a species with a narrow distribution should experience less selection for physiological flexibility in response to climatic variability than a species with a broad distribution, which is likely to have evolved greater phenotypic flexibility to different climatic regimes. It has already been shown that *S. macroura* is a stronger thermoregulator than *S. ooldea* across a broad  $T_a$  range within a single temperature acclimation regime (18–28°C) (Tomlinson, 2012). We show here that *S. macroura* (from a distribution spanning continental Australia), as well as

Table 3. Maximum metabolic rates and thermogenic scope for *S. macroura* and *S. ooldea* in helox and air atmospheres

|                                                                           |       | Acclimation regime |                |                |
|---------------------------------------------------------------------------|-------|--------------------|----------------|----------------|
|                                                                           |       | 12–22°C            | 18–28°C        | 25–35°C        |
| <i>S. macroura</i>                                                        |       |                    |                |                |
| $\dot{V}_{\text{O}_2, \text{max}}$ ( $\text{ml g}^{-1} \text{ h}^{-1}$ )  |       | 17.01±3.90 (6)     | 13.63±1.82 (6) | 9.53±1.21 (6)  |
| Scope                                                                     | Helox | 13.59±2.67 (6)     | 10.17±1.79 (6) | 14.31±3.60 (6) |
|                                                                           | Air   | 6.27±1.81 (4)      | 5.21±1.26 (4)  | 8.43±2.07 (4)  |
| $\dot{V}_{\text{CO}_2, \text{max}}$ ( $\text{ml g}^{-1} \text{ h}^{-1}$ ) |       | 9.50±1.85 (6)      | 8.86±0.90 (6)  | 8.07±0.36 (6)  |
| Scope                                                                     | Helox | 13.41±5.47 (6)     | 14.07±4.25 (6) | 18.16±3.91 (6) |
|                                                                           | Air   | 7.25±2.74 (4)      | 8.44±1.99 (4)  | 10.80±3.45 (4) |
| RER                                                                       |       | 0.71±0.16 (6)      | 0.74±0.14 (6)  | 0.89±0.07 (6)  |
| <i>S. ooldea</i>                                                          |       |                    |                |                |
| $\dot{V}_{\text{O}_2, \text{max}}$ ( $\text{ml g}^{-1} \text{ h}^{-1}$ )  |       | 10.09±1.06 (8)     | 11.35±1.04 (6) | 9.58±0.76 (7)  |
| Scope                                                                     | Helox | 7.31±1.43 (8)      | 8.03±2.12 (4)  | 6.36±1.42 (7)  |
|                                                                           | Air   | 5.69±1.43 (8)      | 3.80±1.40 (4)  | 5.37±1.44 (7)  |
| $\dot{V}_{\text{CO}_2, \text{max}}$ ( $\text{ml g}^{-1} \text{ h}^{-1}$ ) |       | 6.33±0.75 (8)      | 7.56±0.86 (6)  | 7.77±0.95 (7)  |
| Scope                                                                     | Helox | 8.58±1.63 (8)      | 11.53±3.53 (4) | 10.12±2.29 (7) |
|                                                                           | Air   | 8.42±1.11 (8)      | 6.84±3.70 (4)  | 9.07±2.37 (7)  |
| RER                                                                       |       | 0.61±0.04 (8)      | 0.66±0.03 (6)  | 0.81±0.07 (7)  |

Thermogenic scope (scope) is the maximum metabolic rate divided by BMR. RER is the amount of  $\text{CO}_2$  produced per unit of  $\text{O}_2$  consumed. Values are means  $\pm$  s.e.m. (n). See the List of symbols and abbreviations for definitions of variables and abbreviations.

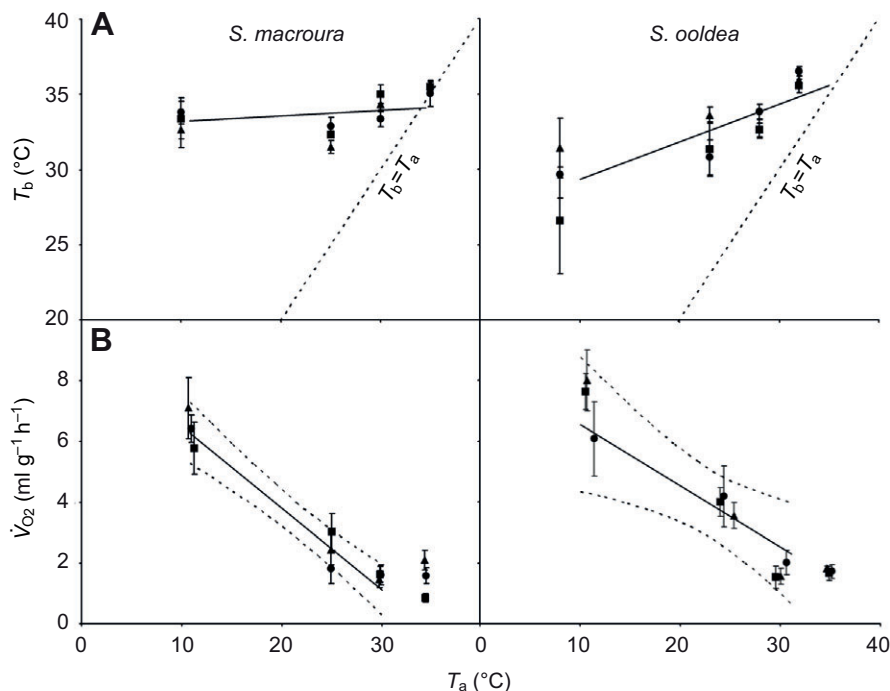

Fig. 1. Energetic variables of *Sminthopsis macroura* and *S. ooldea*, showing the ambient temperature ( $T_a$ ) regression for the 18–28°C acclimation regime (circles), for comparison with the 12–22°C (triangles) and 25–35°C (squares) acclimation regimes. (A) Body temperature ( $T_b$ ), showing significant effects of  $T_a$  for *S. ooldea* ( $P=0.0002$ ) but not *S. macroura* ( $P=0.425$ ) at all acclimation regimes. (B) Standard metabolic rate (SMR), showing no effects chronic acclimation on the SMR pattern of *S. ooldea*, but a change in the thermoneutral zone (TNZ) of *S. macroura* from  $T_a=30$  to 35°C. Data are means  $\pm$  s.e.m.

thermoregulating well in response to a broad range of acute  $T_a$  conditions, was flexible in its thermoregulatory strategies following acclimation to a broad range of chronic temperature regimes. Overall, the propensity to thermoregulate may impart resilience to climatic variability, which is expanded by flexibility in water loss and energetics, while thermolability provides a general reduction of energetic requirement, but potentially at the expense of water economy.

#### Metabolic acclimation

The basic metabolic responses to acute  $T_a$  exposures reported here are similar to previous reports for both species (Geiser and Baudinette, 1987; Hinds et al., 1993; Cooper et al., 2005; Tomlinson, 2012), but *S. macroura* was more flexible in response to chronic thermal acclimation. The similarity in  $T_b$  of *S. macroura* across acute  $T_a$  exposures and between chronic  $T_a$  acclimation regimes, and the similar  $T_b$  variances over all experimental treatments (Fig. 1), indicates robust thermoregulatory control. The variable  $T_b$  of *S. ooldea* and the different variances between experimental  $T_a$  values (Fig. 1) indicate substantial thermolability (see Tomlinson, 2012). At high  $T_a$  acclimation, although the BMR of *S. macroura* had not changed, the TNZ extended to a higher  $T_a$  (Fig. 1). *Sminthopsis ooldea*, however, showed no flexibility in its metabolic responses to chronic  $T_a$  regimes (Fig. 1). Although we define the TNZ here based upon metabolic and thermal parameters (as opposed to an increase in EWL), similar patterns can be seen by consideration of EWL, but these were less clear and less robust to statistical analysis. The results presented here suggest that *S. macroura* can modify their metabolic physiology in response to acclimation to low  $T_a$  regimes, but that *S. ooldea* are tightly constrained by a constancy of physiological responses to chronic  $T_a$  conditions.

The metabolic response to thermal acclimation differs between various groups of mammals and birds (Hart, 1971; Heldmaier et al., 1986; Dawson and Olson, 1988; Koteja, 1996; Rose et al., 1999; Russell and Chappell, 2007). Heteromyine rodents, for example, enhance metabolism in response to cold acclimation (Hill, 1983;

Russell and Chappell, 2007), as do most bird species (McKechnie, 2008). The results presented here for *S. macroura* concur with this expectation [and those that have previously found effects of thermal

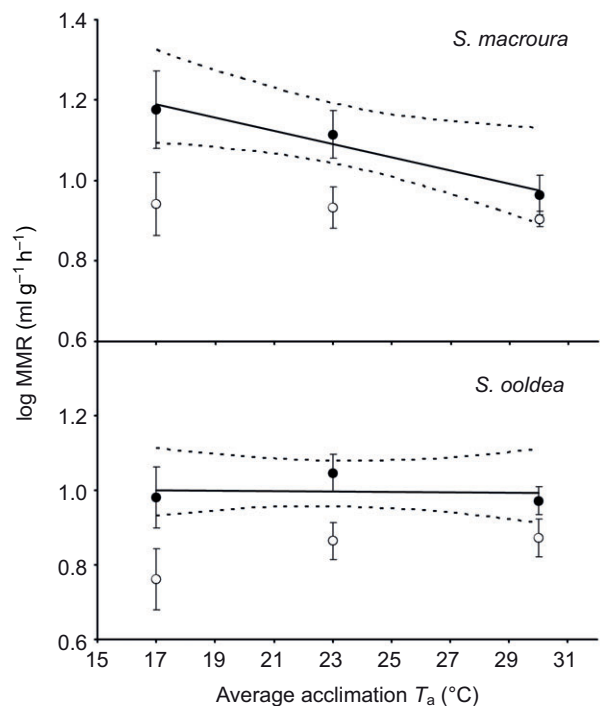

Fig. 2. Maximum metabolism in  $\dot{V}_{O_2}$  (filled circles) and  $\dot{V}_{CO_2}$  (open circles) at each acclimation regime, showing a significant decline in maximum  $\dot{V}_{O_2}$ , but no change in  $\dot{V}_{CO_2}$  for *S. macroura*, with increasing acclimation  $T_a$  and no changes in maximum metabolic rate (MMR)  $\dot{V}_{CO_2}$  or  $\dot{V}_{O_2}$  for *S. ooldea* across acclimation regimes. The x-axis represents the average daily  $T_a$  of each acclimation regime from maximum to minimum. Data are means  $\pm$  s.e.m.

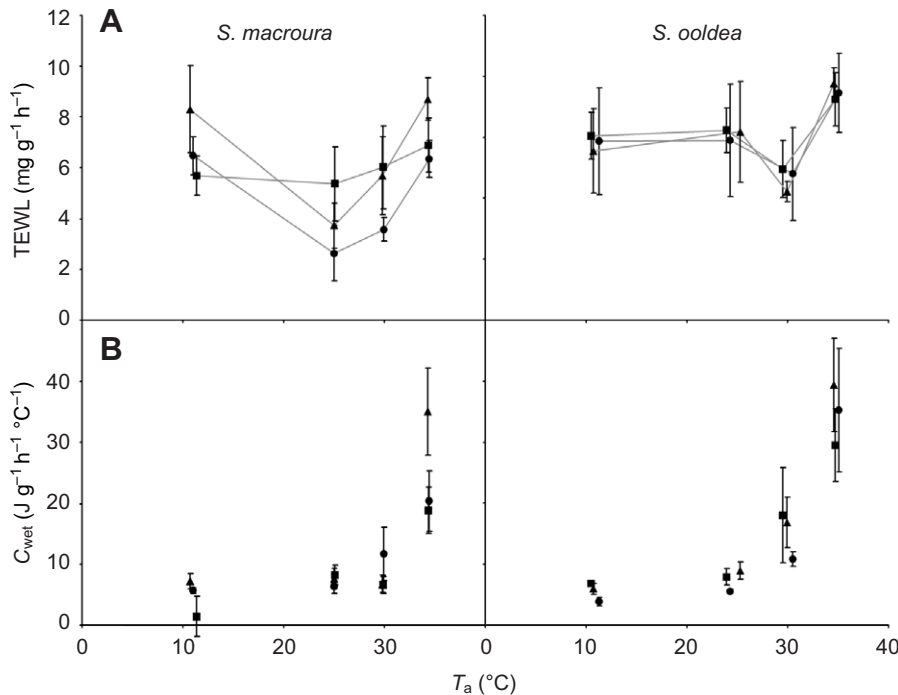

Fig. 3. Effects of  $T_a$  on water budget variables of *S. macroura* and *S. ooldea* for the 12–22°C (triangles), 18–28°C (circles) and 25–35°C (squares) acclimation regimes. (A) Total evaporative water loss (TEWL), showing a consistent pattern of increased EWL for *S. macroura* at high and low  $T_a$  for the 12–22°C and 18–28°C acclimation regimes, but not the 25–35°C acclimation regime, and relatively consistent values across the experimental range in all acclimation regimes for *S. ooldea*. (B) Wet thermal conductance ( $C_{wet}$ ), showing relatively consistent values between  $T_a=10$  and 30°C, but increases and higher variance at  $T_a=30$ °C at all acclimation regimes for both species. Data are means  $\pm$  s.e.m.

acclimation in small marsupials (e.g. Geiser et al., 2003)], although studies of small marsupials have generally reported a lack of phenotypic change to thermal acclimation (Smith and Dawson, 1984; Dawson and Olson, 1988; Withers and Hulbert, 1988), as reported here for *S. ooldea*.

The most obvious criticism of the conclusion that *S. macroura* are more physiologically flexible than *S. ooldea* (and that *S. ooldea* are not flexible) relates to the limitations of the acclimation period and intensity. The choice of a 14-day acclimation was based on results from several other studies, suggesting that this is a suitable duration for physiological acclimation (Nespolo et al., 2001; Soobramoney et al., 2003). Other studies, particularly of similar small marsupials, used periods of up to 6 weeks (Reynolds and Hulbert, 1982; Smith and Dawson, 1984; Smith and Dawson, 1985; Dawson and Olson, 1988; Withers and Hulbert, 1988). For species such as the dunnarts studied here from arid environments, seasonal changes occur over approximately 2–4 months (Australian Bureau of Meteorology, unpublished data), so an acclimation period of 2 weeks may not be long enough to elicit a full seasonal acclimatisation. Further, the breadth of the experimental acclimations described here may not be wide enough (from cool acclimation at 12–22°C to warm acclimation at 25–35°C) to trigger the fullest extent of acclimation. This seems unlikely, however, given that the range of acclimations encompasses the full extent of climatic conditions within their natural distributions. Further, at a colder acclimation regime (5–15°C) neither species was able to maintain body mass with food restriction.

There is some ambiguity in the acclimation of MMR in the dunnarts studied here. Although both dunnart species had similar MMR at the 25–35°C acclimation regime, the MMR of *S. ooldea* was not affected by thermal acclimation, whereas *S. macroura* showed evidence of acclimation in maximal  $\dot{V}O_2$  (Fig. 2). The thermogenic scopes calculated here for both species are quite similar to the scopes of 8–10 in air reported by Smith and Dawson for kowari (Smith and Dawson, 1985), but much greater than the 2.6 in air and the 5.1 in helox previously reported for *S. macroura* (Geiser et al.,

1996). The difference almost certainly reflects the  $T_a$  exposure during the trials, where we used helox at  $T_a=10$ °C, but Geiser et al. (Geiser et al., 1996) used helox at  $T_a=18$ °C. *Sminthopsis macroura* nearly doubled its thermogenic scope in response to cold acclimation, but *S. ooldea* showed no change in maximal metabolism, and we conclude that *S. macroura* adjusted MMR as an acclimatory response, but that *S. ooldea* did not. The different acclimation patterns of MMR between species concur with the patterns of acclimation for SMR, where *S. macroura* showed phenotypic flexibility but *S. ooldea* did not. A lack of acclimation capacity of MMR for *S. ooldea* is in disagreement with many other findings that peak metabolism is decreased in magnitude (Dawson and Olson, 1988; Withers and Hulbert, 1988; Chappell and Hammond, 2004; Rezende et al., 2004; Russell and Chappell, 2007) or duration (Smith and Dawson, 1985) for warm-acclimated mammals. This may reflect the reliance of *S. ooldea* on thermolability rather than metabolic heat production in response to cold. We conclude that *S. macroura* seems to be more reliant on plasticity of MMR as an element of its thermoregulation in the face of chronic exposure to different thermal environments. The thermolability of *S. ooldea* may contribute to the lower thermogenic scopes and conservative MMRs measured here, and it would be of interest to assess the thermoregulation of the kowari studied by Smith and Dawson (Smith and Dawson, 1985).

#### Acclimation of EWL and RWE

The EWL measured here for *S. macroura* within the TNZ was not significantly different from that predicted allometrically by Withers et al. (Withers et al., 2006) under the 12–22°C regime ( $t_5=1.256$ ,  $P=0.264$ ), the 18–28°C regime ( $t_5=0.636$ ,  $P=0.553$ ) or the 25–35°C regime ( $t_5=1.523$ ,  $P=0.188$ ). Similarly, the EWL of *S. ooldea* within the TNZ was not different from that predicted by Withers et al. (Withers et al., 2006) during any of the acclimation regimes (12–22°C,  $t_7=0.052$ ,  $P=0.960$ ; 18–28°C,  $t_7=0.339$ ,  $P=0.745$ ; 25–35°C,  $t_7=0.782$ ,  $P=0.460$ ).



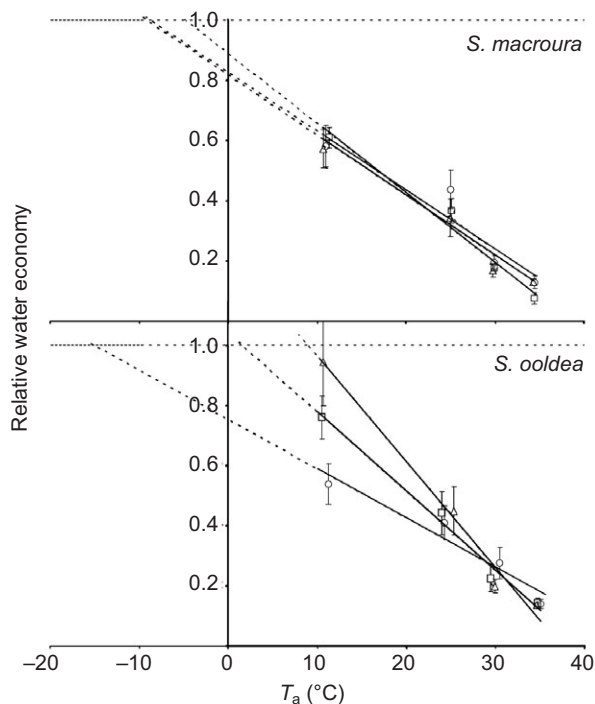

Fig. 4. Relative water economy profiles of *S. macroura* and *S. ooldea* under different acclimation regimes, showing a consistent pattern for *S. macroura* between  $T_a=10$  and  $30^\circ\text{C}$  for the 12–22°C (triangles), 18–28°C (circles) and 25–35°C (squares) acclimation regimes, but significantly variable responses for *S. ooldea*. Data are means  $\pm$  s.e.m.

The EWL of *S. macroura* at both ends of the  $T_a$  range (10 and  $35^\circ\text{C}$ ) decreased with warm acclimation (Fig. 3). Although this should theoretically result in increased RWE, this was not the case (Fig. 4), but the reason for the failure of this mechanism remains unclear. *Sminthopsis ooldea*, in contrast, showed no change in EWL in response to acute  $T_a$  exposures or acclimation (Fig. 3). Although this inflexibility, coupled with the inflexibility of SMR (implying inflexible MWP), should result in consistent RWE between acclimation regimes, there were significant changes of RWE for *S. ooldea*. The pattern of these differences does not concur with any expectations of thermal acclimation, in that the warmest and the coolest acclimations had similar RWE patterns and both acclimations had generally higher RWE than the intermediate acclimation regime (Fig. 4). Furthermore, there was a strong correlation of  $\dot{V}_{\text{O}_2}$  with EWL for both *S. macroura* ( $r=0.73$ ) and *S. ooldea* ( $r=0.71$ ) at low  $T_a$ , implying that the increased EWL was due to the ventilatory demands of increased metabolic activity. The high thermal conductance of *S. ooldea* at  $T_a=10^\circ\text{C}$  suggests that, at all acclimation regimes other than 18–28°C, the dunnarts did not rest properly, and this elevated metabolism and EWL could reasonably account for the increased RWE. Finally, the order of increase in conductance and RWE was not consistent with the increasing magnitude of chronic acclimation  $T_a$ , but in the temporal order of the experimental process, suggesting that there may be uncontrolled responses of *S. ooldea* to captivity that interact with the physiological lability of the species to produce this unexpected result (see Geiser and Ferguson, 2001). The difficulty in partitioning avenues of water loss, however, limits our current interpretation of similar levels of EWL flexibility. For example, it is likely for *S. macroura* that its similar levels of EWL (and hence EHL) at  $T_a=35$  and  $10^\circ\text{C}$  represent different thermoregulatory and

evaporative challenges: elevated EHL to dissipate heat  $T_a=35^\circ\text{C}$ , and increased EWL at  $T_a=10^\circ\text{C}$  resulting largely from increased ventilatory requirements for increased thermoregulatory SMR. Thus, the lack of change in EWL of *S. ooldea* at low  $T_a$  is presumed also to reflect the more broadly thermolabile response of this species to a  $T_a$  gradient.

### Torpor and acclimation

The propensity towards torpor decreased with increasing acclimation temperatures for *S. macroura*. Acclimation to higher  $T_a$  regimes may shift the torpor regulation point upwards (the  $T_a$  where TMR increase to regulate torpid  $T_b$ ); as such, the dunnarts would no longer have a lower critical point of  $T_a>10^\circ\text{C}$  [established by Geiser and Baudinette (Geiser and Baudinette, 1985) and Tomlinson (Tomlinson, 2012)]. If  $T_a=10^\circ\text{C}$  fell below the acclimated lower critical point, then entry into torpor may have become prohibitively dangerous (analogous to lower  $T_a$  thresholds in cooler acclimation regimes; see S.T., unpublished data) and the dunnarts may not attempt torpor as often under these conditions. *Sminthopsis ooldea*, however, seemed to have no differences in their patterns of torpor use between acclimation regimes. They did, however, have a higher TMR for the 12–22°C regime, which may be analogous to the higher BMRs that were expected (but not observed) under the same acclimation regime. Given that their normothermic SMR and BMR did not change with chronic thermal challenge, and their reliance on torpor and heterothermy at  $T_a$  that nominally approach the TNZ of most small mammals [i.e.  $T_a=30^\circ\text{C}$ ; Tomlinson et al. (Tomlinson et al., 2007) and references therein], it seems that broad thermolability and torpor are the thermoregulatory responses of *S. ooldea* to cold challenge, not phenotypic flexibility with chronic acclimation.

### Ecophysiological and evolutionary interpretations

The ecophysiological implications of our acclimation experiments can only be generalised to possible acclimatisation because of the distinction between laboratory ‘acclimation’ and field ‘acclimatisation’ discussed by McKechnie (McKechnie, 2008) and Piersma and Drent (Piersma and Drent, 2003). With due consideration of these semantic distinctions, however, species that exhibit phenotypic flexibility in response to chronic acclimation could be expected to inhabit broad, variable geographical distributions. This is the pattern for the dunnarts studied here: *S. macroura* showed flexibility in BMR, MMR and thermoregulatory EWL and has a broad continental distribution, whereas *S. ooldea* showed less flexibility, exhibiting the same poor thermoregulatory response at all acclimation regimes, and has a comparatively small distribution that falls within a fairly predictable and restricted climatic envelope.

Given that the Sminthopsini are variable in their morphology on the basis of habitat and climate (where *S. ooldea* exhibits the most derived morphological characters associated with an arid environment) (Archer, 1981), finding different responses of these two species during acclimation to chronic temperature regimes accords with expectations. Aside from *S. macroura* and *S. crassicaudata* (Godfrey, 1968; Morton, 1978; Geiser and Baudinette, 1985; Nagy et al., 1988; Frey, 1991; Holloway and Geiser, 1995; Song and Geiser, 1997; Song et al., 1998; Zosky, 2002; Zosky and O’Shea, 2003; Cooper et al., 2005), very few other sminthopsines have been studied in physiological terms. *Sminthopsis macroura* and *S. ooldea* also represent different lineages of the Sminthopsini (Blacket et al., 1999). If responses to the realised ecological niche of these taxa differ along phylogenetic lines, then other members of the *S. psammophila* species group (which includes *S. ooldea*)

may be similarly thermally labile and as dependent upon torpor as *S. ooldea*, compared with members of the *S. macroura* species group (e.g. *S. crassicaudata* and *S. macroura*) that are not so dependent upon torpor or thermolability. Tight homeothermy is presumably ancestral, not derived, in the Sminthopsini. This allowed *S. macroura* and *S. crassicaudata* to expand into broad distributions, as it was selection for thermolability that allowed *S. ooldea* to adapt specifically to a hyper-arid distribution. Following the conclusions of Felsenstein (Felsenstein, 1985) and Garland and Adolph (Garland and Adolph, 1994) that two-species comparisons suggest associations that can only be 'proved' by multi-specific phylogenetic replication, broader interest in the physiology of a wider range of the Sminthopsini may provide great insight into the costs and benefits of maintaining homeothermy in ecosystems of varying productivity.

#### LIST OF ABBREVIATIONS

|                  |                                           |
|------------------|-------------------------------------------|
| $B_C$            | Bartlett's comparison of variance         |
| BMR              | basal metabolic rate                      |
| $C_{dry}$        | dry thermal conductance                   |
| $C_{wet}$        | wet thermal conductance                   |
| EHL              | evaporative heat loss                     |
| EWL              | evaporative water loss                    |
| MHP              | metabolic heat production                 |
| MMR              | maximum metabolic rate                    |
| MWP              | metabolic water production                |
| PRWE             | point of relative water economy           |
| RER              | respiratory exchange ratio                |
| RWE              | relative water economy                    |
| SMR              | standard metabolic rate                   |
| SNK              | Student–Newman–Keuls <i>post hoc</i> test |
| $T_a$            | ambient temperature                       |
| $T_b$            | body temperature                          |
| TEWL             | total evaporative water loss              |
| TMR              | torpid metabolic rate                     |
| TNZ              | thermoneutral zone                        |
| $\dot{V}_{CO_2}$ | rate of carbon dioxide uptake             |
| $\dot{V}_{O_2}$  | rate of oxygen uptake                     |

#### ACKNOWLEDGEMENTS

We acknowledge Dr Karl Brennan (DEC Western Australia, Goldfield Region) and Mr Keith Morris (DEC Western Australia, Science Division) for access to Lorna Glen Station for the collection of *S. ooldea*, and Drs Scott Thompson, Jessica Oates and Graham Thompson (Coffey Environments), Drs Stewart Ford and Victoria Cartledge (*ecologia* Environment), Mr Roy Teale (Biota Environmental Scientists), and Mr David Steane and Mr Paul Bolton (Outback Ecology) for the capture and provision of *S. macroura*.

#### FUNDING

This research was funded by the School of Animal Biology, University of Western Australia, and the Holsworth Wildlife Research Endowment (ANZ Philanthropy Partners). S.T. was supported by an Australian Postgraduate Award.

#### REFERENCES

- Angilletta, M. J. J., Cooper, B. S., Schuler, M. S. and Boyles, J. G. (2010). The evolution of thermal physiology in endotherms. *Front. Biosci.* **E2**, 861–881.
- Archer, M. (1981). Results of the Archbold Expeditions No. 104: systematic revision of the marsupial dasyurid genus *Sminthopsis* Thomas. *Bull. Am. Mus. Nat. Hist.* **168**, 65–223.
- Aslin, H. J. (1983). *Ooldea* dunnart (*Sminthopsis ooldea*). In *The Australian Museum Complete Book of Australian Mammals* (ed. R. Strahan), p. 54. Sydney: Angus and Robertson.
- Blacket, M. J., Krajewski, C., Labrinidis, A., Cambron, B., Cooper, S. and Westerman, M. (1999). Systematic relationships within the dasyurid marsupial tribe Sminthopsini – a multigene approach. *Mol. Phylogenet. Evol.* **12**, 140–155.
- Bozinovic, F., Novoa, F. and Veloso, C. (1990). Season changes in energy expenditure and digestive tract of *Abrothrix andinus* (Cricetidae) in the Andes Ranges. *Physiol. Zool.* **63**, 1216–1231.
- Chappell, M. A. and Hammond, K. A. (2004). Maximal aerobic performance of deer mice in combined cold and exercise challenges. *J. Comp. Physiol. B* **174**, 41–48.
- Cohen, B. H. (2008). *Explaining Psychological Statistics*. Hoboken, NJ: John Wiley & Sons.
- Cooper, C. E. and Withers, P. C. (2008). Allometry of evaporative water loss in marsupials: implications of the effect of ambient relative humidity on the physiology of brushtail possums (*Trichosurus vulpecula*). *J. Exp. Biol.* **211**, 2759–2766.
- Cooper, C. E. and Withers, P. C. (2009). Thermal, metabolic, hygric and ventilatory physiology of the sandhill dunnart (*Sminthopsis psammophila*; Marsupialia, Dasyuridae). *Comp. Biochem. Physiol.* **153A**, 317–323.
- Cooper, C. E., McAllan, B. M. and Geiser, F. (2005). Effect of torpor on the water economy of an arid-zone marsupial, the stripe-faced dunnart (*Sminthopsis macroura*). *J. Comp. Physiol. B* **175**, 323–328.
- Cooper, C. E., Withers, P. C. and Cruz-Neto, A. P. (2009). Metabolic, ventilatory and hygric physiology of the gracile mouse opossum (*Gracilinanus agilis*). *Physiol. Biochem. Zool.* **82**, 153–162.
- Dawson, T. J. and Olson, J. M. (1988). Thermogenic capabilities of the opossum *Monodelphis domestica* when warm and cold acclimated: similarities between American and Australian marsupials. *Comp. Biochem. Physiol.* **89A**, 85–91.
- Dawson, W. R. (2003). Plasticity in avian responses to thermal challenges – an essay in honor of Jacob Marder. *Isr. J. Zool.* **49**, 95–109.
- Ewer, R. F. (1968). A preliminary survey of the behaviour in captivity of the dasyurid marsupial, *Sminthopsis crassicaudata* (Gould). *Zeit. Tierpsych.* **25**, 319–365.
- Feder, M. E. (1987). The analysis of physiological diversity: the prospects for pattern documentation and general questions in ecological physiology. In *New Directions in Ecological Physiology* (ed. M. E. Feder, A. F. Bennett, W. G. Burggren and R. B. Huey), pp. 38–75. Cambridge: Cambridge University Press.
- Felsenstein, J. (1985). Phylogenies and the comparative method. *Am. Nat.* **125**, 1–15.
- Frey, H. (1991). Energetic significance of torpor and other energy-conserving mechanisms in free-living *Sminthopsis crassicaudata* (Marsupialia: Dasyuridae). *Aust. J. Zool.* **39**, 689–708.
- Garland, T. J. and Adolph, S. C. (1994). Why not to do two-species comparative studies: limitations on inferring adaptation. *Physiol. Zool.* **67**, 797–828.
- Geiser, F. (1994). Hibernation and daily torpor in marsupials: a review. *Aust. J. Zool.* **42**, 1–16.
- Geiser, F. and Baudinette, R. V. (1985). The influence of temperature and photophase on daily torpor in *Sminthopsis macroura* (Dasyuridae: Marsupialia). *J. Comp. Physiol. B* **156B**, 129–134.
- Geiser, F. and Baudinette, R. V. (1987). Seasonality of torpor and thermoregulation in three dasyurid marsupials. *J. Comp. Physiol. B* **157**, 335–344.
- Geiser, F. and Ferguson, C. (2001). Intraspecific differences in behaviour and physiology: effects of captive breeding on patterns of torpor in feathered gliders. *J. Comp. Physiol. B* **71**, 569–576.
- Geiser, F. and Turbill, C. (2009). Hibernation and daily torpor minimize mammalian extinctions. *Naturwissenschaften* **96**, 1235–1240.
- Geiser, F., Song, X. and Körtner, G. (1996). The effect of He-O<sub>2</sub> exposure on metabolic rate, thermoregulation and thermal conductance during normothermia and daily torpor. *J. Comp. Physiol. B* **166**, 190–196.
- Geiser, F., Drury, R. L., McAllan, B. M. and Wang, D. H. (2003). Effects of temperature acclimation on maximum heat production, thermal tolerance, and torpor in a marsupial. *J. Comp. Physiol. B* **173**, 437–442.
- Godfrey, G. (1968). Body-temperatures and torpor in *Sminthopsis crassicaudata* and *S. larapinta* (Marsupialia – Dasyuridae). *J. Zool.* **156**, 499–511.
- Grigg, G. C. and Beard, L. A. (2000). Hibernation by echidnas in mild climates: hints about the evolution of endothermy? In *Life in the Cold. Eleventh International Hibernation Symposium* (ed. G. Heldmaier and M. Klingenspor), pp. 5–20. Berlin: Springer-Verlag.
- Hart, J. S. (1971). Rodents. In *Comparative Physiology of Thermoregulation* (ed. G. C. Whitton), pp. 1–149. New York: Academic Press.
- Heldmaier, G., Boeckler, H., Buchberger, A., Klaus, S., Puchalski, W., Steinlacher, S. and Wiesinger, H. (1986). Seasonal variation of thermogenesis. In *Living in the Cold* (ed. H. C. Heller, X. J. Musacchia and L. C. H. Wang), pp. 361–372. New York: Elsevier.
- Hill, R. W. (1983). Thermal physiology and energetics of *Peromyscus*: ontogeny, body temperature, metabolism, insulation, and microclimatology. *J. Mammal.* **64**, 19–37.
- Hinds, D. S., Baudinette, R. V., MacMillen, R. E. and Halpern, E. A. (1993). Maximum metabolism and the aerobic factorial scope of endotherms. *J. Exp. Biol.* **182**, 41–56.
- Holloway, J. C. and Geiser, F. (1995). Influence of torpor on daily energy expenditure of the dasyurid marsupial *Sminthopsis crassicaudata*. *Comp. Biochem. Physiol.* **112A**, 59–66.
- Holloway, J. C. and Geiser, F. (2001). Effects of helium/oxygen and temperature on aerobic metabolism in the marsupial sugar glider, *Petaurus breviceps*. *Physiol. Biochem. Zool.* **74**, 219–225.
- Hudson, J. W. (1978). Shallow, daily torpor: a thermoregulatory adaptation. In *Strategies in Cold: Natural Torpidity and Thermogenesis* (ed. L. C. H. Wang and J. W. Hudson), pp. 67–108. New York: Academic Press.
- Klingenspor, M., Niggemann, H. and Heldmaier, G. (2000). Modulation of leptin sensitivity by short photoperiod acclimation in the Djungarian hamster, *Phodopus sungorus*. *J. Comp. Physiol. B* **170**, 37–43.
- Koteja, P. (1996). Limits to the energy budget in a rodent, *Peromyscus maniculatus*: the central limitation hypothesis. *Physiol. Zool.* **69**, 981–993.
- Lee, P. and Schmidt-Nielsen, K. (1971). Respiratory and cutaneous evaporation in the zebra finch: effect on water balance. *Am. J. Physiol.* **220**, 1598–1605.
- Lewontin, R. C. (1969). The bases of conflict in biological explanation. *J. Hist. Biol.* **2**, 35–53.
- Malan, A. (1996). The origins of hibernation: a reappraisal. In *Adaptations to the Cold* (ed. F. Geiser, A. J. Hulbert and S. C. Nicol), pp. 1–6. Armidale, NSW: University of New England Press.
- McKechnie, A. E. (2008). Phenotypic flexibility in basal metabolic rate and the changing view of avian physiological diversity: a review. *J. Comp. Physiol. B* **178**, 235–247.
- McKenzie, N. L., Burbidge, A. A. and Baynes, A. (2006). *Australian Mammal Map Updates*. Available at <http://www.dec.wa.gov.au/content/view/2588/1813/>

- Menon, G. K., Baptista, L. F., Brown, B. E. and Elias, P. M.** (1989). Avian epidermal differentiation II: adaptive response of permeability barrier to water deprivation and replenishment. *Tissue Cell* **21**, 83-92.
- Morton, S. R.** (1978). Torpor and nest-sharing in free-living *Sminthopsis crassicaudata* (Marsupialia) and *Mus musculus* (Rodentia). *J. Mammal.* **59**, 569-575.
- Morton, S. R.** (1983a). Fat-tailed dunnart *Sminthopsis crassicaudata*. In *The Australian Museum Complete Book of Australian Mammals* (ed. R. Strahan), pp. 61-62. Sydney: Angus and Robertson.
- Morton, S. R.** (1983b). Stripe-faced dunnart *Sminthopsis macroura*. In *The Australian Museum Complete Book of Australian Mammals* (ed. R. Strahan), pp. 63-64. Sydney: Angus and Robertson.
- Munn, A. J., Kern, P. and McAllan, B. M.** (2010). Coping with chaos: unpredictable food supplies intensify torpor use in an arid-zone marsupial, the fat-tailed dunnart (*Sminthopsis crassicaudata*). *Naturwissenschaften* **97**, 601-605.
- Nagy, K. A., Lee, A. K., Martin, R. W. and Fleming, M. R.** (1988). Field metabolic rate and food requirement of a small dasyurid marsupial, *Sminthopsis crassicaudata*. *Aust. J. Zool.* **36**, 293-299.
- Nespolo, R. F., Bacigalupe, L. D., Rezende, E. L. and Bozinovic, F.** (2001). When nonshivering thermogenesis equals maximum metabolic rate: thermal acclimation and phenotypic plasticity of fossorial *Spalacopus cyanus* (Rodentia). *Physiol. Biochem. Zool.* **74**, 325-332.
- Nespolo, R. F., Bacigalupe, L. D., Sabat, P. and Bozinovic, F.** (2002). Interplay among energy metabolism, organ mass and digestive enzyme activity in the mouse-opossum *Thylamys elegans*: the role of thermal acclimation. *J. Exp. Biol.* **205**, 2697-2703.
- Nicol, S. C. and Anderson, N. A.** (1996). Hibernation in the echidna: not an adaptation to the cold. In *Adaptations to the Cold* (ed. F. Geiser, A. J. Hulbert and S. C. Nicol), pp. 7-12. Armidale, NSW: University of New England Press.
- Opazo, J. C., Nespolo, R. F. and Bozinovic, F.** (1999). Arousal from torpor in the Chilean mouse-opossum (*Thylamys elegans*): does non-shivering thermogenesis play a role? *Comp. Biochem. Physiol.* **123**, 393-397.
- Ostrowski, S., Williams, J. B., Mésochina, P. and Sauerwein, H.** (2006). Physiological acclimation of a desert antelope, Arabian oryx (*Oryx leucorox*), to long-term food and water restriction. *J. Comp. Physiol. B* **176**, 191-201.
- Piersma, T. and Drent, J.** (2003). Phenotypic flexibility and the evolution of organismal design. *Trends Ecol. Evol.* **18**, 228-233.
- Reynolds, W. and Hulbert, A. J.** (1982). Cold acclimation in a small dasyurid marsupial: *Antechinus stuartii*. In *Carnivorous Marsupials* (ed. M. Archer), pp. 279-283. Sydney: Royal Zoological Society of New South Wales.
- Rezende, E. L., Chappell, M. A. and Hammond, K. A.** (2004). Cold-acclimation in *Peromyscus*: temporal effects and individual variation in maximum metabolism and ventilatory rates. *J. Exp. Biol.* **207**, 295-305.
- Rose, R. W., West, A. K., Ye, J. M., McCormack, G. H. and Colquhoun, E. Q.** (1999). Nonshivering thermogenesis in a marsupial (the Tasmanian bettong *Bettongia gaimardi*) is not attributable to brown adipose tissue. *Physiol. Biochem. Zool.* **72**, 699-704.
- Rosenmann, M. and Morrison, P.** (1974). Maximum oxygen consumption and heat loss facilitation in small homeotherms by He-O<sub>2</sub>. *Am. J. Physiol.* **226**, 490-494.
- Russell, G. A. and Chappell, M. A.** (2007). Is BMR repeatable in deer mice? Organ mass correlates and the effects of cold acclimation and natal altitude. *J. Comp. Physiol. B* **177**, 75-87.
- Smith, B. K. and Dawson, T. J.** (1984). Changes in the thermal balance of a marsupial (*Dasyuroides byrnei*) during cold and warm acclimation. *J. Therm. Biol.* **9**, 199-204.
- Smith, B. K. and Dawson, T. J.** (1985). Use of helium-oxygen to examine the effect of cold acclimation on the summit metabolism of a marsupial, *Dasyuroides byrnei*. *Comp. Biochem. Physiol.* **81A**, 445-449.
- Song, X. and Geiser, F.** (1997). Daily torpor and energy expenditure in *Sminthopsis macroura*: interactions between food and water availability and temperature. *Physiol. Zool.* **70**, 331-337.
- Song, X., Körtner, G. and Geiser, F.** (1995). Reduction of metabolic rate and thermoregulation during daily torpor. *J. Comp. Physiol. B* **165**, 291-297.
- Song, X., Körtner, G. and Geiser, F.** (1998). Temperature selection and use of torpor by the marsupial *Sminthopsis macroura*. *Physiol. Behav.* **64**, 675-682.
- Soobramoney, S., Downs, C. T. and Adams, N. J.** (2003). Physiological variability in the fiscal shrike *Lanius collaris* along an altitudinal gradient in South Africa. *J. Therm. Biol.* **28**, 581-594.
- Thomas, D. W., Pacheco, M. A., Fournier, F. and Fortine, D.** (1998). Validation of the effect of helox on thermal conductance in homeotherms using heated models. *J. Therm. Biol.* **23**, 377-380.
- Tomlinson, S.** (2012). Physiological and behavioural responses of Western Australian dunnarts (*Sminthopsis* spp.) to energetic challenge. PhD thesis, University of Western Australia, Crawley, WA.
- Tomlinson, S., Withers, P. C. and Cooper, C.** (2007). Hypothermia versus torpor in response to cold stress in the native Australian mouse *Pseudomys hermannsburgensis* and the introduced house mouse *Mus musculus*. *Comp. Biochem. Physiol.* **148A**, 645-650.
- Wang, L. H. C.** (1989). Ecological, physiological and biochemical aspects of torpor in mammals and birds. In *Advances in Comparative and Environmental Physiology* (ed. L. C. H. Wang), pp. 361-401. Berlin: Springer-Verlag.
- Williams, J. B. and Tieleman, B. I.** (2000). Flexibility in basal metabolic rate and evaporative water loss among hoopoe larks exposed to different environmental temperatures. *J. Exp. Biol.* **203**, 3153-3159.
- Withers, K. W. and Hulbert, A. J.** (1988). Cold acclimation in the marsupial *Antechinus stuartii*: thyroid function and metabolic rate. *Aust. J. Zool.* **36**, 421-427.
- Withers, P. C.** (1992). *Comparative Animal Physiology*. Fort Worth, TX: Saunders College Publishing.
- Withers, P. C.** (2001). Design, calibration and calculation for flow-through respirometry systems. *Aust. J. Zool.* **49**, 445-461.
- Withers, P. C. and Cooper, C. E.** (2009). Thermal, metabolic and hygric physiology of the little red kaluta, *Dasykaluta rosamondae* (Dasyuromorphia: Dasyuridae). *J. Mammal.* **90**, 752-760.
- Withers, P. C., Richardson, K. C. and Wooller, R. D.** (1990). Metabolic physiology of euthermic and torpid honey possums. *Aust. J. Zool.* **37**, 685-693.
- Withers, P. C., Cooper, C. E. and Larcombe, A. N.** (2006). Environmental correlates of physiological variables in marsupials. *Physiol. Biochem. Zool.* **79**, 437-453.
- Zar, J. H.** (1999). *Biostatistical Analysis*. Upper Saddle River, NJ: Prentice Hall.
- Zosky, G. R.** (2002). The parasympathetic nervous system: its role during torpor in the fat-tailed dunnart (*Sminthopsis crassicaudata*). *J. Comp. Physiol. B* **172**, 677-684.
- Zosky, G. R. and O'Shea, J. E.** (2003). The cardiac innervation of a marsupial heterotherm, the fat-tailed dunnart (*Sminthopsis crassicaudata*). *J. Comp. Physiol. B* **173**, 293-300.
